# Supplementary material for: ‘It would not be tolerated in any other profession except medicine’: survey reporting on undergraduates’ exposure to bullying and harassment in their first placement year
Source: PubMed Central journal article supplement — BMJ Open. 2014 Jul 9;4(7):e005140. doi: 10.1136/bmjopen-2014-005140 (PMC4091461; doi:10.1136/bmjopen-2014-005140), 2014-07-09
Supplement: bmjopen-2014-005140.draft_revisions.pdf [file bmjopen-2014-005140.draft_revisions.pdf]

**“It would not be tolerated in any other profession except medicine”: Survey reporting on undergraduates’ exposure to bullying and harassment in their first placement year**

**Anja Timm**

BMJ Open uses open peer review. Reviewers’ reports and the previous, reviewed versions of manuscripts accepted for publication are posted online.

Previous versions of this manuscript included text that identified the institution where the survey was carried out. The final version of the paper removed the identification of the institution. Therefore the previous versions of the paper have not been posted online.

If you are interested in seeing the previous versions of this manuscript please contact [editorial.bmjopen@bmjgroup.com](mailto:editorial.bmjopen@bmjgroup.com) These will then be anonymised and supplied.
